# Supplementary material for: Transcriptome Analysis Reveals the Response Mechanism of Frl-Mediated Resistance to Fusarium oxysporum f. sp. radicis-lycopersici (FORL) Infection in Tomato
Source: MDPI journal article supplement (doi:10.3390/ijms23137078), 2022-06-25
Supplement: s1 [file s1]

| 软件名字     | 开发者姓名                                           | 城市， 国家              |
|----------|-------------------------------------------------|---------------------|
| RSEM     | Bo Li , Colin N Dewey                           | Madison,USA         |
| DESeq2   | Michael Love, Wolfgang Huber,<br>Simon Anders   | Heidelberg, Germany |
| HISAT2   | Daehwan Kim, Ben Langmead,<br>Steven L Salzberg | Maryland, USA       |
| Bowtie 2 | Ben Langmead and Steven L<br>Salzberg           | Maryland, USA       |
| SOAPnuke | Yuxin Chen                                      | Shenzhen, China     |
| mapman   | Oliver Thimm, Mark Stitt                        | Golm, Germany       |
